# Supplementary material for: CdSe nanowire solar cells using carbazole as a surface modifier
Source: Royal Society of Chemistry journal article supplement (doi:10.1039/c3ta10387k), 2013-01-01
Supplement: c3ta10387k.pdf [file c3ta10387k.pdf]

## Supporting Information

### **CdSe Nanowire Solar Cells using Carbazole as Surface Modifier**

Hyunbong Choi, Masaru Kuno, Gregory V. Hartland and

Prashant V. Kamat\*

Radiation Laboratory, Departments of Chemistry and Biochemistry and  
Chemical & Biomolecular Engineering, University of Notre Dame Notre  
Dame, IN 46556

---

\* Address correspondence to this author ([pkamat@nd.edu](mailto:pkamat@nd.edu))

## Supporting Information

**Cyclic voltamogram** Cyclic voltammetry was carried out with a Gamry PC-14 potentiostat. A three-electrode system was used and consisted of a SCE, working electrode, a platinum wire electrode. Redox potential of carbazole-SH were measured in CH<sub>3</sub>CN with 0.1M (n-C<sub>4</sub>H<sub>9</sub>)<sub>4</sub>N-PF<sub>6</sub> a scan rate of 50 mVs<sup>-1</sup> (vs. Fc/Fc<sup>+</sup>).

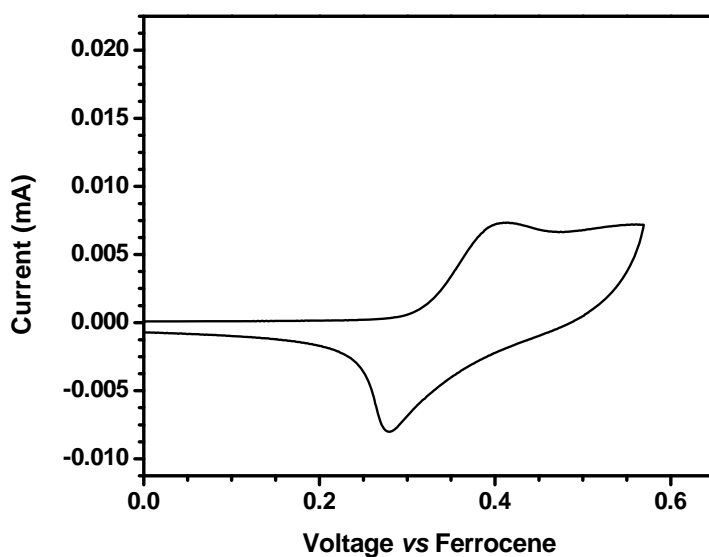

**Figure S1.** CV of 0.1 M carbazole-thiol with 0.1M (n-C<sub>4</sub>H<sub>9</sub>)<sub>4</sub>N-PF<sub>6</sub> acetonitrile solution (scan rate between 50 mVs<sup>-1</sup>)
